# Supplementary material for: Passion fruit-like microspheres of FeS2 wrapped with carbon as an excellent fast charging material for supercapacitors
Source: Royal Society of Chemistry journal article supplement (doi:10.1039/d2nj01749k), 2022-01-01
Supplement: d2nj01749k1.pdf [file d2nj01749k1.pdf]

Passion fruit-like microspheres of FeS<sub>2</sub> wrapped with carbon as excellent fast charging materials for supercapacitors

Xuexia Liu, Weizhen Deng, Limin Liu, Yinfeng Wang, Chunfang Huang, and Zhijun Wang\*

College of Chemistry and Chemical Engineering, Jinggangshan University, Ji'an, Jiangxi 343009,  
PR China

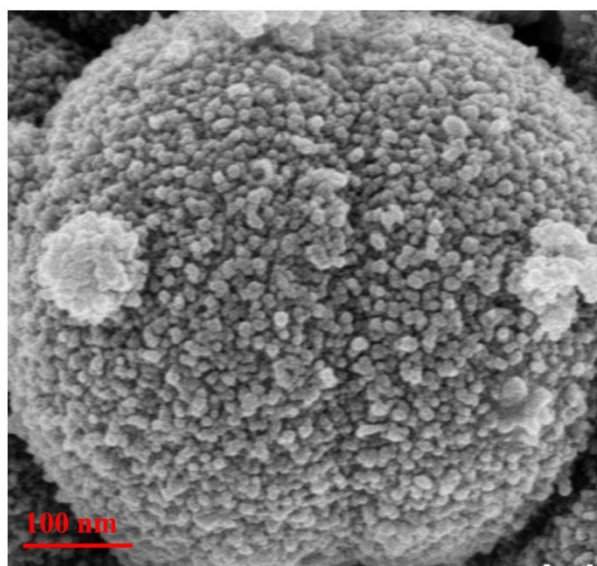

**Fig. S1** SEM image of FeS<sub>2</sub>@Carbon-3 microspheres.

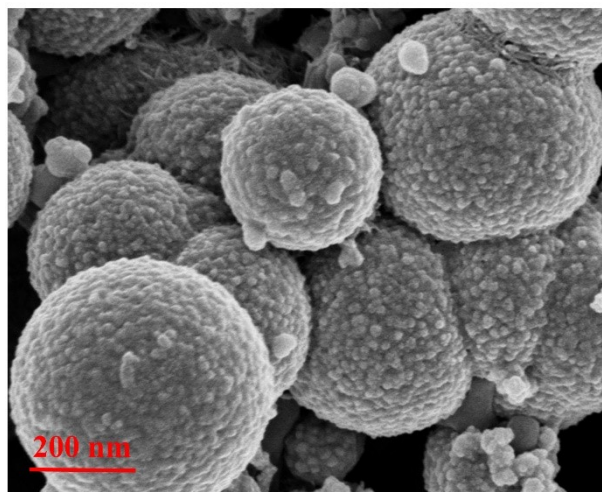

**Fig. S2** SEM image of  $\text{FeS}_2$ @Carbon-0 microspheres.

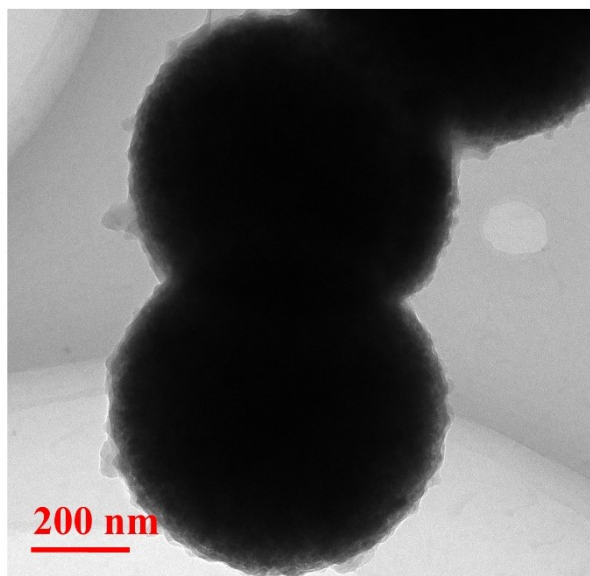

**Fig. S3** TEM image of FeS<sub>2</sub>@Carbon-0 microspheres.

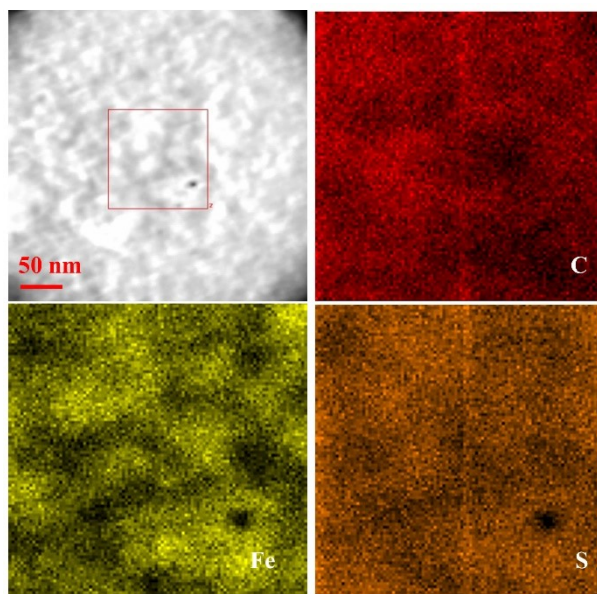

**Fig. S4** Elemental mapping images of FeS<sub>2</sub>@Carbon-3 microspheres.

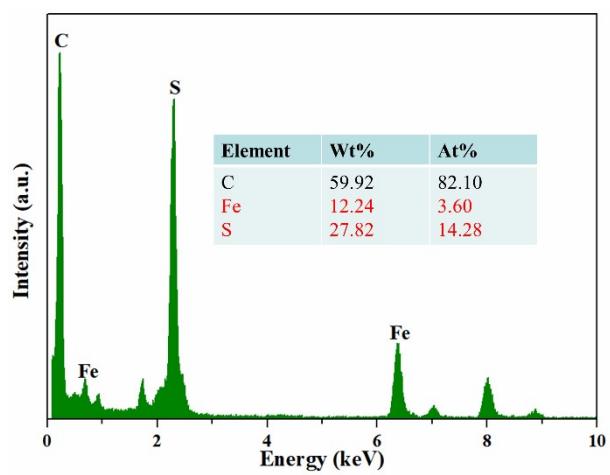

**Fig. S5** EDX spectrum of FeS<sub>2</sub>@Carbon-3 microspheres.

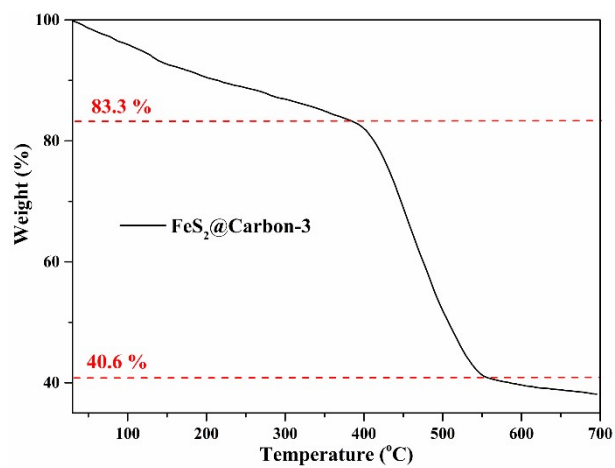

**Fig. S6** TGA of FeS<sub>2</sub>@Carbon-3 microspheres.

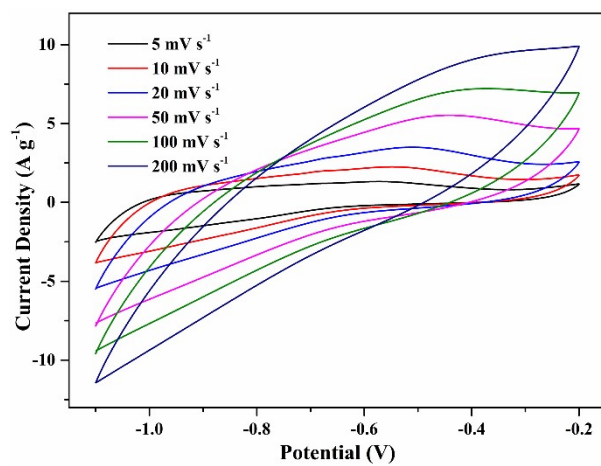

**Fig. S7** CV curves of FeS<sub>2</sub> at different scan rates.



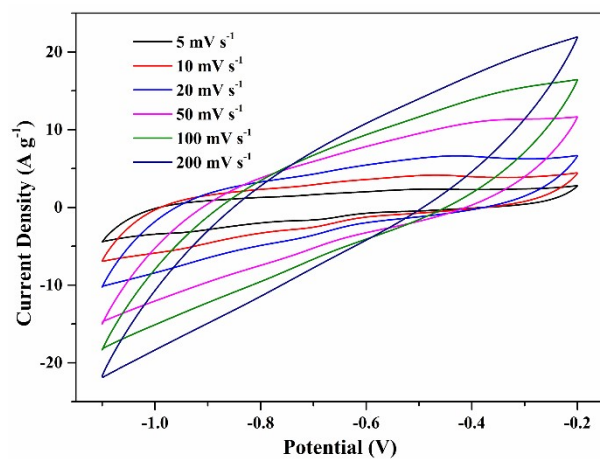

**Fig. S8** CV curves of the FeS<sub>2</sub>@Carbon-0 microspheres at different scan rates.

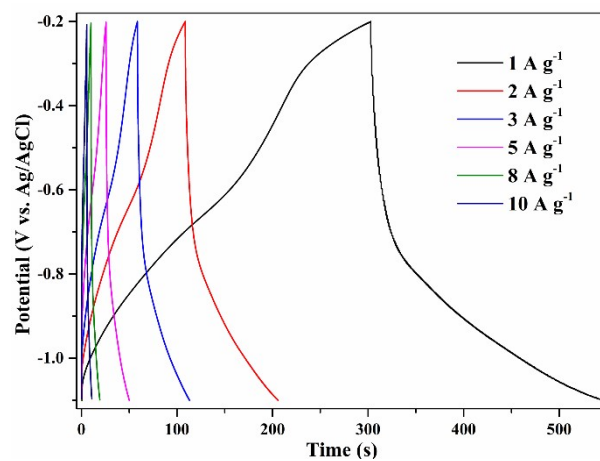

**Fig. S9** Galvanostatic charge-discharge curves of FeS<sub>2</sub> microspheres at different current densities.

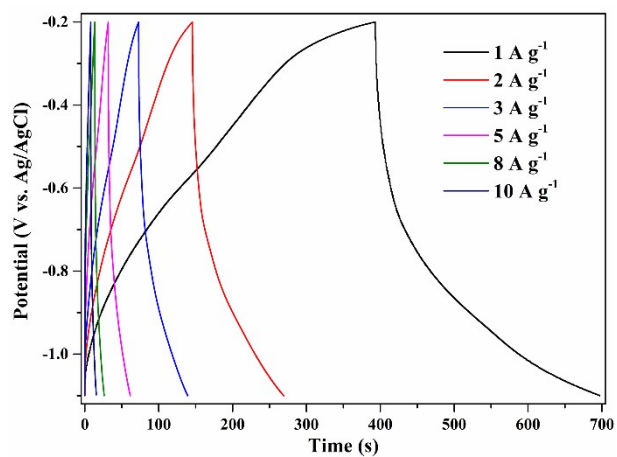

**Fig. S10** Galvanostatic charge-discharge curves of FeS<sub>2</sub>@Carbon-0 microspheres at different current densities.

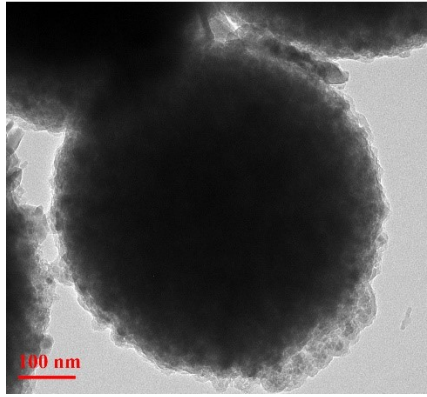

**Fig. S11** TEM image of FeS<sub>2</sub>@Carbon-3 microspheres after cycling test.

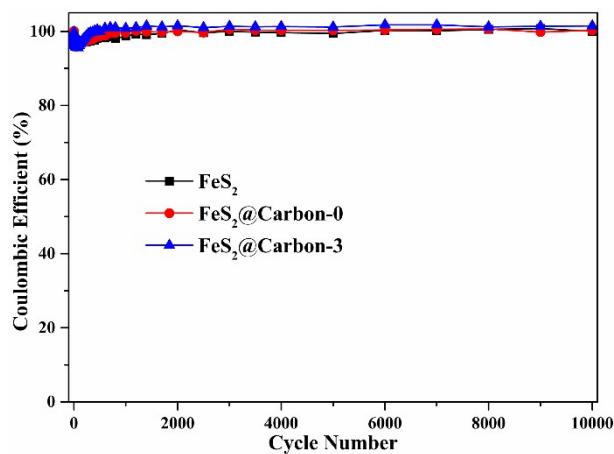

**Fig. S12** The coulombic efficiency of FeS<sub>2</sub>, FeS<sub>2</sub>@Carbon-0 and FeS<sub>2</sub>@Carbon-3 microspheres at the current density of 5 A g<sup>-1</sup> associated to the galvanostatic charge-discharge cycles.

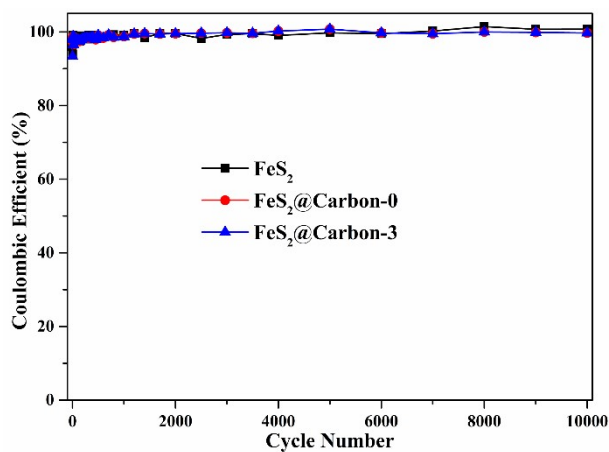

**Fig. S13** The coulombic efficiency of FeS<sub>2</sub>, FeS<sub>2</sub>@Carbon-0 and FeS<sub>2</sub>@Carbon-3 microspheres at the current density of 8 A g<sup>-1</sup> associated to the galvanostatic charge-discharge cycles.

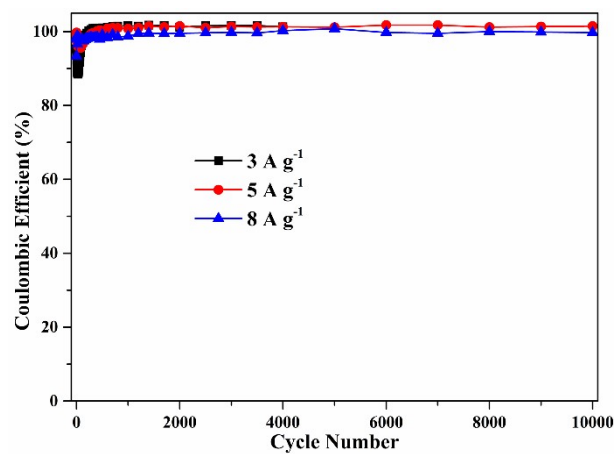

**Fig. S14** The coulombic efficiency of FeS<sub>2</sub>@Carbon-3 microspheres at different current densities of 3, 5 and 8 A g<sup>-1</sup> associated to the galvanostatic charge-discharge cycles.

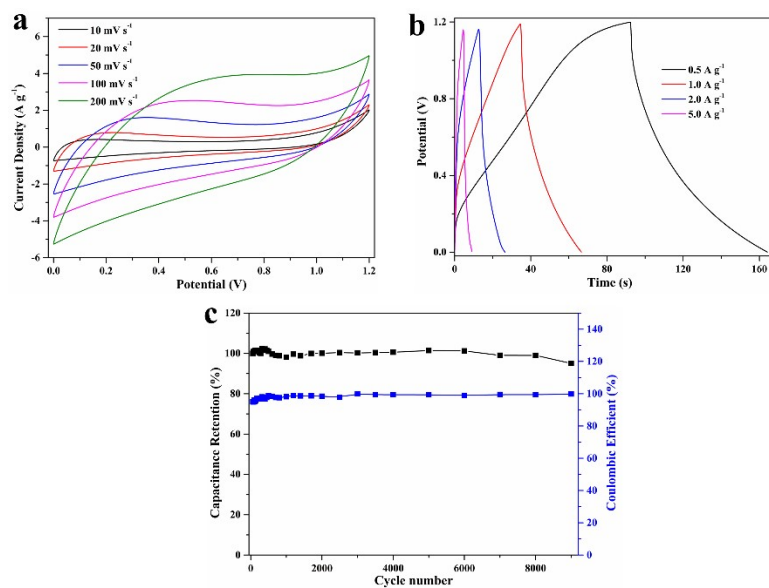

**Fig. S15** (a) CV at different scan rates, (b) GCD curves at different current densities and (c) Long cycle performance of the HSC.



**Table S1** The specific capacitance of FeS<sub>2</sub>, FeS<sub>2</sub>@Carbon-0 and FeS<sub>2</sub>@Carbon-3 microspheres at different scan rates.

| Scan rates (mV s <sup>-1</sup> ) | Specific capacitance (F g <sup>-1</sup> ) |                            |                            |
|----------------------------------|-------------------------------------------|----------------------------|----------------------------|
|                                  | FeS <sub>2</sub>                          | FeS <sub>2</sub> @Carbon-0 | FeS <sub>2</sub> @Carbon-3 |
| 5                                | 285.5                                     | 542.7                      | 470.6                      |
| 10                               | 231.4                                     | 457.3                      | 427.6                      |
| 20                               | 162.7                                     | 328.3                      | 330.6                      |
| 50                               | 90.3                                      | 180.8                      | 197.9                      |
| 100                              | 50.1                                      | 103.9                      | 122.0                      |
| 200                              | 29.3                                      | 56.1                       | 70.1                       |

**Table S2** The specific capacitance of FeS<sub>2</sub>, FeS<sub>2</sub>@Carbon-0 and FeS<sub>2</sub>@Carbon-3 microspheres at different current densities.

| Current density (A g <sup>-1</sup> ) | Specific capacitance (F g <sup>-1</sup> ) |                            |                            |
|--------------------------------------|-------------------------------------------|----------------------------|----------------------------|
|                                      | FeS <sub>2</sub>                          | FeS <sub>2</sub> @Carbon-0 | FeS <sub>2</sub> @Carbon-3 |
| 1                                    | 270.0                                     | 337.8                      | 278.4                      |
| 2                                    | 216.0                                     | 274.7                      | 242.2                      |
| 3                                    | 181.3                                     | 221.0                      | 208.7                      |
| 5                                    | 134.4                                     | 165.6                      | 171.7                      |
| 8                                    | 82.7                                      | 112.9                      | 126.2                      |
| 10                                   | 58.9                                      | 83.3                       | 100.0                      |

**Table S3** Comparison the specific capacitance with some reported literature on FeS<sub>2</sub> composites for supercapacitors.

| Materials                                               | Electrolyte                        | Specific capacitance     | Current density        | Ref              |
|---------------------------------------------------------|------------------------------------|--------------------------|------------------------|------------------|
| FeS <sub>2</sub> nano-alloys                            | 30% KOH                            | 406 F g <sup>-1</sup>    | 1 A g <sup>-1</sup>    | 1                |
| FeS <sub>2</sub> @Fe <sub>2</sub> O <sub>3</sub> hybrid | 1M Li <sub>2</sub> SO <sub>4</sub> | 255 F g <sup>-1</sup>    | 1 A g <sup>-1</sup>    | 2                |
| FeS <sub>2</sub> nanobelts                              | 1M Na <sub>2</sub> SO <sub>4</sub> | 317.9 F g <sup>-1</sup>  | 3 A g <sup>-1</sup>    | 3                |
| FeS <sub>2</sub> /GNS                                   | 2M KOH                             | 793 C g <sup>-1</sup>    | 3 A g <sup>-1</sup>    | 4                |
| FeS <sub>2</sub> nanoellipsoids                         | 2M KOH                             | 515 C g <sup>-1</sup>    | 1 A g <sup>-1</sup>    | 5                |
| FeS <sub>2</sub> /graphene aerogel                      | 6M KOH                             | 268.7 F g <sup>-1</sup>  | 2 A g <sup>-1</sup>    | 6                |
| FeS <sub>2</sub> /Fe <sub>2</sub> O <sub>3</sub> @S-rGO | 6M KOH                             | 790 F g <sup>-1</sup>    | 2 A g <sup>-1</sup>    | 7                |
| P-FeS <sub>2</sub> /GNS                                 | 2M KOH                             | 246 mAh g <sup>-1</sup>  | 3 A g <sup>-1</sup>    | 8                |
| FeS <sub>2</sub> nanotubes                              | 3M KCl                             | 320 F g <sup>-1</sup>    | 1.25 A g <sup>-1</sup> | 9                |
| FeS <sub>2</sub> /MoS <sub>2</sub> nanosheet            | 3M KOH                             | 495 mF cm <sup>-2</sup>  | 1 mA cm <sup>-2</sup>  | 10               |
| FeS <sub>2</sub> /PVP composite                         | 3M KOH                             | 526.08 F g <sup>-1</sup> | 1 A g <sup>-1</sup>    | 11               |
| FeS <sub>2</sub> /3DPC                                  | 1M KOH                             | 304 F g <sup>-1</sup>    | 2 A g <sup>-1</sup>    | 12               |
| Pyrite FeS <sub>2</sub>                                 | 3.5M KOH                           | 206 F g <sup>-1</sup>    | 1 A g <sup>-1</sup>    | 13               |
| Petal-like FeS <sub>2</sub>                             | 6M KOH                             | 321.3 F g <sup>-1</sup>  | 1 A g <sup>-1</sup>    | 15               |
| FeS <sub>2</sub> @Carbon-3                              | 1M KOH                             | 278.4 F g <sup>-1</sup>  | 1 A g <sup>-1</sup>    | <b>This work</b> |

### ***Supporting References***

- [1] V. Sridhar, H. Park, *J. Alloy. Compd.*, 2018, **732**, 799-805.
- [2] Y. Zhang, J. Q. Liu, Z. D. Lu, H. Xia, *Mater. Lett.*, 2016, **166**, 223-226.
- [3] J. Z. Chen, X. Y. Zhou, C. T. Mei, J. L. Xu, S. Zhou, C. P. Wong, *Electrochim. Acta*, 2016, **222**, 172-176.
- [4] Z. Q. Sun, H. M. Lin, F. Zhang, X. Yang, H. Jiang, Q. Wang, F. Y. Qu, *J. Mater. Chem. A*, 2018, **6**, 14956-14966.
- [5] Z. Q. Sun, X. Yang, H. M. Lin, F. Zhang, Q. Wang, F. Y. Qu, *Inorg. Chem. Front.*, 2019, **6**, 659-670.
- [6] L. Y. Pei, Y. Yang, H. Chu, J. F. Shen, M. X. Ye, *Ceram. Int.*, 2016, **42**, 5053-5061.
- [7] R. R. Bu, Y. Deng, Y. L. Wang, Y. Zhao, Q. Q. Shi, Q. Zhang, Z. Y. Xiao, Y. Y. Li, W. Sun, L. Wang, *ACS Appl. Energy Materials*, 2021, **4**, 11004-11013.
- [8] Z. Q. Sun, F. Z. Li, Z. Q. Ma, Q. Wang, F. Y. Qu, *J. Alloy. Compd.*, 2021, **854**, 157114.
- [9] Y. C. Chen, J. H. Shi, Y. K. Hsu, *Appl. Surf. Sci.*, 2020, **503**, 144304.
- [10] Y. R. Wang, Y. B. Xie, *J. Alloy. Compd.*, 2020, **824**, 153936.
- [11] I. K. Durga, S. S. Rao, R. M. N. Kalla, J. W. Ahn, H. J. Kim, *J. Energy Storage*, 2020, **18**, 101216.
- [12] Y. Y. Huang, S. Bao, Y. S. Yin, J. L. Lu, *Appl. Surf. Sci.*, 2021, **565**, 150538.
- [13] S. Venkateshalu, P. F. Kumar, P. Kollu, S. K. Jeong, A. N. Grace, *Electrochim. Acta.*, 2018, **290**, 378-389.
- [14] A. M. Zardkhouhoui, S. S. H. Davarani, A. A. Asgharinezhad, *Dalton Trans.*, 2019, **48**, 4274-4282.
